# Supplementary material for: Enhanced adsorption of CO2at steps of ultrathin ZnO: the importance of Zn–O geometry and coordination
Source: Royal Society of Chemistry journal article supplement (doi:10.1039/c6cp08379j), 2017-01-01
Supplement: c6cp08379j1.pdf [file c6cp08379j1.pdf]

**Electronic supplementary information (ESI)**

**Enhanced adsorption of CO<sub>2</sub> at steps of ultrathin ZnO: the importance of  
Zn-O geometry and coordination**

Xingyi Deng<sup>1,2,\*</sup>, Dan C. Sorescu<sup>1</sup>, Junseok Lee<sup>1,2</sup>

<sup>1</sup>National Energy Technology Laboratory (NETL), United States Department of Energy, P.O. Box  
10940, Pittsburgh, Pennsylvania 15236, United States, <sup>2</sup>AECOM, P.O. Box 618, South Park,  
Pennsylvania 15129, United States

*Corresponding Author E-mail:* [Xingyi.Deng@NETL.DOE.GOV](mailto:Xingyi.Deng@NETL.DOE.GOV)

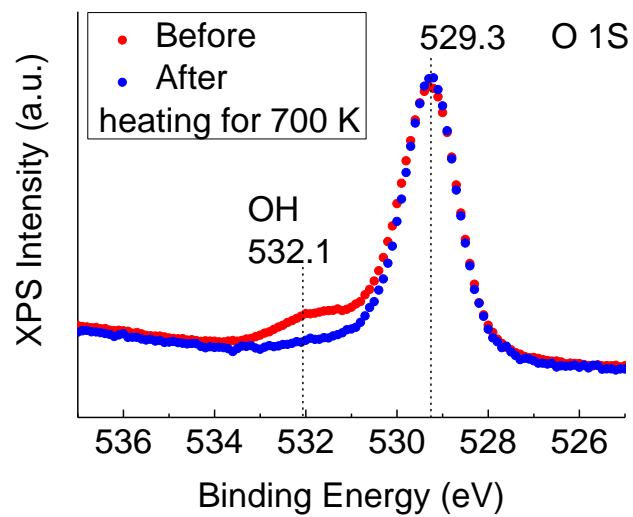

Fig. S1 O 1s XP spectra of as-prepared 1.7 MLE ZnO(L2-L3) and after heating to 700 K, showing the removal of hydroxyls.

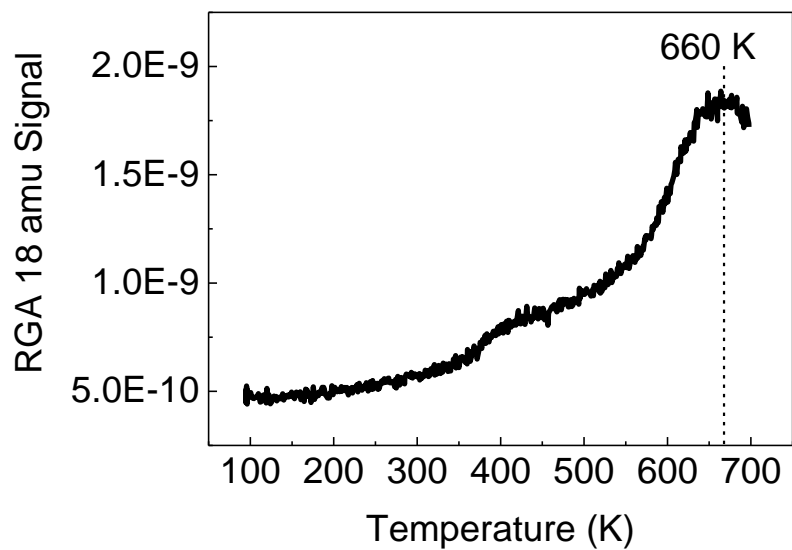

Fig. S2 TPD spectrum of H<sub>2</sub>O (m/z = 18) from as-prepared 1.7 MLE ZnO(L2-L3), showing the hydroxyl removal via recombinative desorption as water occurring at T = 660 K (heating rate 2 K/s).

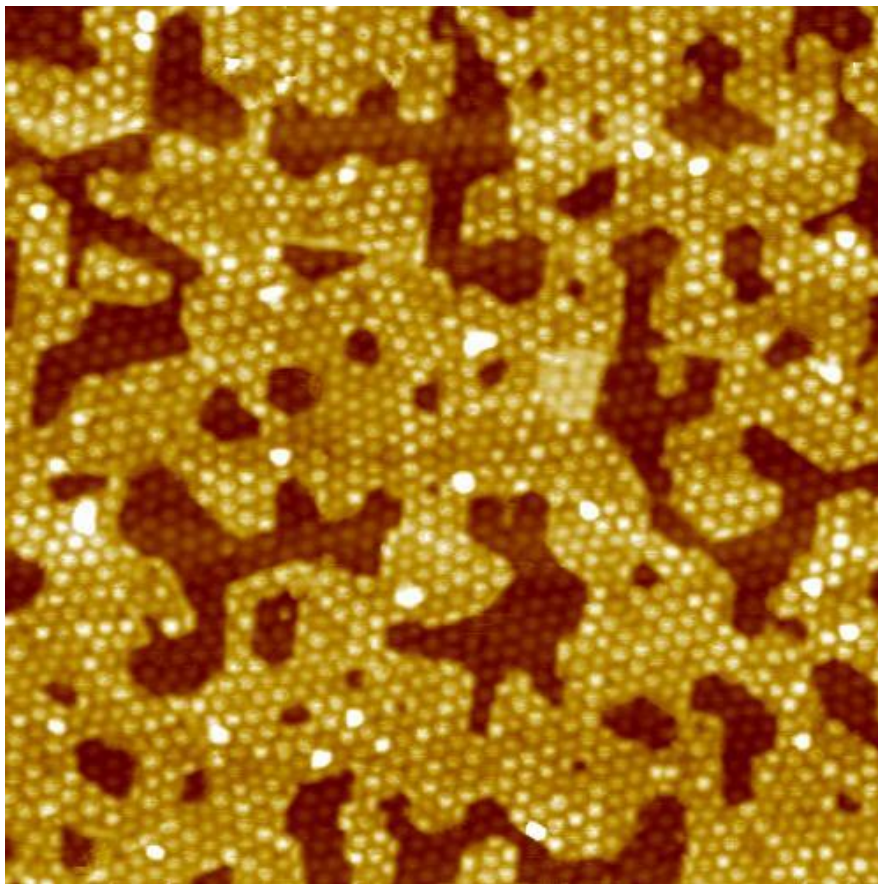

Fig. S3 STM image of 2.3 MLE ZnO(L2-L3) ( $100 \times 100 \text{ nm}^2$ ,  $V = 1.5 \text{ V}$ ,  $I = 50 \text{ pA}$ ).

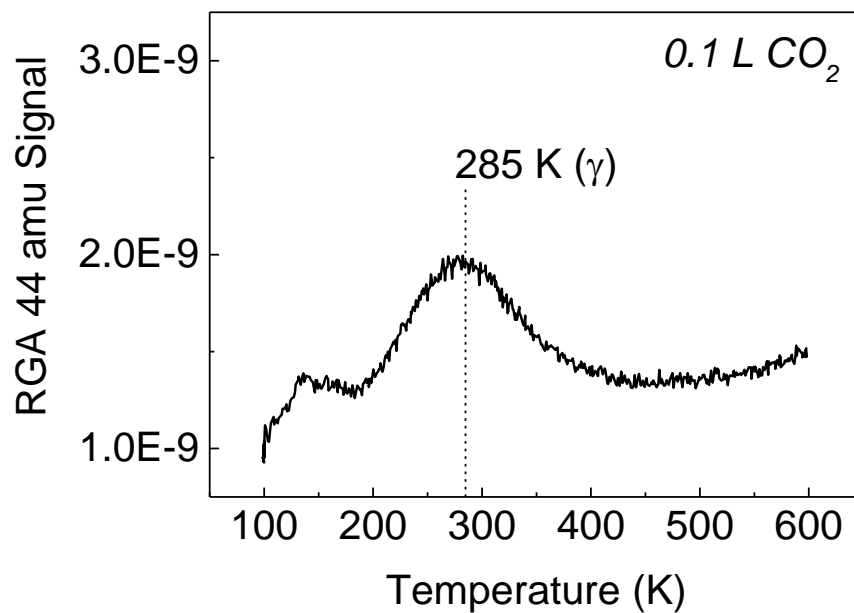

Fig. S4 TPD spectrum of CO<sub>2</sub> (m/z = 44) from 2.3 MLE ZnO(L2-L3) following the CO<sub>2</sub> exposure of 0.1 L (1 L =  $1.33 \times 10^{-6}$  mbar·s) at T = 100 K (heating rate 2 K/s).
